# Supplementary material
Source: publisher figshare collection journal article supplement (https://asha.figshare.com/ndownloader/files/40238167)
Supplement: Supplementary file 1 [file 40238167]

**Supplemental Material S1. Demographic information.**

| Feature                                                      | Group by hearing |                | $\chi^2 / Z / t$ | <i>p</i> |
|--------------------------------------------------------------|------------------|----------------|------------------|----------|
|                                                              | MMHL             | NH             |                  |          |
| <b>Maternal gestational age (y) <sup>a</sup></b>             |                  |                |                  |          |
| ( <i>M</i> ± <i>SD</i> )                                     | 29.4 ± 4.6       | 29.6 ± 3.6     | 0.236            | .814     |
| <b>Pregnancy diseases <i>n</i> (%) <sup>b</sup></b>          |                  |                |                  |          |
| No                                                           | 26 (76.5)        | 38 (84.4)      | 1.786            | .679     |
| Diabetes                                                     | 5 (14.7)         | 3 (6.7)        |                  |          |
| Hypertension                                                 | 1 (2.9)          | 1 (2.2)        |                  |          |
| Hypothyroidism                                               | 2 (5.9)          | 3 (6.7)        |                  |          |
| <b>Mode of production <i>n</i> (%) <sup>b</sup></b>          |                  |                |                  |          |
| Eutocia                                                      | 19 (55.9)        | 30 (66.7)      | 0.956            | .328     |
| Cesarean section                                             | 15 (44.1)        | 15 (33.3)      |                  |          |
| <b>Twins <i>n</i> (%) <sup>b</sup></b>                       |                  |                |                  |          |
| No                                                           | 31 (91.2)        | 45 (100)       | 4.127            | .076     |
| Yes                                                          | 3 (8.8)          | 0 (0.0)        |                  |          |
| <b>Gestational week <i>n</i> (%) <sup>b</sup></b>            |                  |                |                  |          |
| < 37-week                                                    | 2 (5.9)          | 2 (4.4)        | 0.083            | 1        |
| ≥ 37-week                                                    | 32 (94.1)        | 43 (95.6)      |                  |          |
| <b>Birth weight (kg) <sup>c</sup></b>                        |                  |                |                  |          |
| Median (Q1, Q3)                                              | 3.2 (3.0, 3.6)   | 3.3 (3.2, 3.7) | -1.085           | .278     |
| <b>Neonatal condition <i>n</i> (%) <sup>b</sup></b>          |                  |                |                  |          |
| No                                                           | 29 (85.3)        | 39 (86.7)      | 0.030            | 1        |
| NICU                                                         | 5 (14.7)         | 6 (13.3)       |                  |          |
| <b>Neonatal hyperbilirubinemia <i>n</i> (%) <sup>b</sup></b> |                  |                |                  |          |
| No                                                           | 27 (79.4)        | 36 (80.0)      | 0.004            | .949     |
| Yes                                                          | 7 (20.6)         | 9 (20.0)       |                  |          |

|                                                      |           |           |       |      |
|------------------------------------------------------|-----------|-----------|-------|------|
| Previous allergic history <i>n</i> (%) <sup>b</sup>  |           |           |       |      |
| No                                                   | 24 (70.6) | 39 (86.7) | 3.1   | .078 |
| Yes                                                  | 10 (29.4) | 6 (13.3)  |       |      |
| Father's educational level <i>n</i> (%) <sup>b</sup> |           |           |       |      |
| High school or special school or below               | 7 (20.6)  | 2 (4.4)   | 5.271 | .072 |
| College or bachelor's degree                         | 21 (61.8) | 31 (68.9) |       |      |
| Graduate or above                                    | 6 (17.6)  | 12 (26.7) |       |      |
| Mother's educational level <i>n</i> (%) <sup>b</sup> |           |           |       |      |
| High school or special school or below               | 7 (20.6)  | 2 (4.4)   | 5.401 | .067 |
| College or bachelor's degree                         | 24 (70.6) | 35 (77.8) |       |      |
| Graduate or above                                    | 3 (8.8)   | 8 (17.8)  |       |      |
| Family members <i>n</i> (%) <sup>b</sup>             |           |           |       |      |
| Nuclear family                                       | 16 (47.1) | 12 (26.7) | 3.520 | .610 |
| Stem family                                          | 18 (52.9) | 33 (73.3) |       |      |
| Main caregiver <i>n</i> (%) <sup>b</sup>             |           |           |       |      |
| Parents                                              | 23 (67.6) | 25 (55.6) | 5.011 | .116 |
| Grandparents                                         | 4 (11.8)  | 3 (6.7)   |       |      |
| Parents and grandparents                             | 6 (17.6)  | 17 (37.8) |       |      |
| Others                                               | 1 (2.9)   | 0 (0)     |       |      |
| Total household income <i>n</i> (%) <sup>b</sup>     |           |           |       |      |
| < 100,000                                            | 6 (17.6)  | 4 (8.9)   | 3.827 | .281 |
| 100,000–200,000                                      | 12 (35.3) | 11 (24.4) |       |      |
| 200,000–300,000                                      | 5 (14.7)  | 13 (28.9) |       |      |
| > 300,000                                            | 11 (32.4) | 17 (37.8) |       |      |

---

**Present height (cm) <sup>c</sup>**

|                 |                  |                  |        |      |
|-----------------|------------------|------------------|--------|------|
| Median (Q1, Q3) | 113.5 (108, 116) | 114 (110, 117.5) | -0.814 | .416 |
|-----------------|------------------|------------------|--------|------|

**Present weight (kg) <sup>c</sup>**

|                 |                |              |        |      |
|-----------------|----------------|--------------|--------|------|
| Median (Q1, Q3) | 21(16.8, 23.4) | 20.2(20, 23) | -0.518 | .604 |
|-----------------|----------------|--------------|--------|------|

---

*Note.* No demographic data were statistically different. MMHL = minimal and mild hearing loss; NH = normal hearing. <sup>a</sup>The data were normally distributed, and independent sample *t*-test was used. <sup>b</sup> $\chi^2$  test was used. <sup>c</sup>The data did not conform to the normal distribution, so the nonparametric test (rank sum test) was used for statistical analysis.
